# Supplementary material for: Acoustic tethering of microorganisms
Source: Oxford University Press journal article supplement (doi:10.1242/jeb.244089), 2022-10-11
Supplement: jeb244089supp.pdf [file jeb244089supp.pdf]

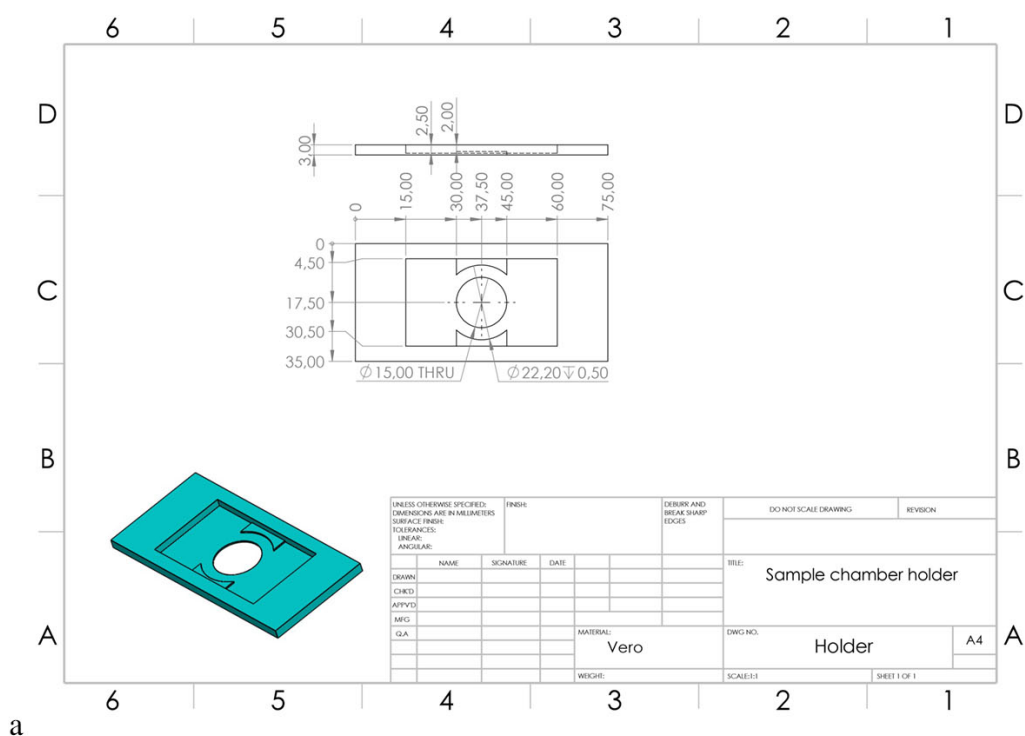

a

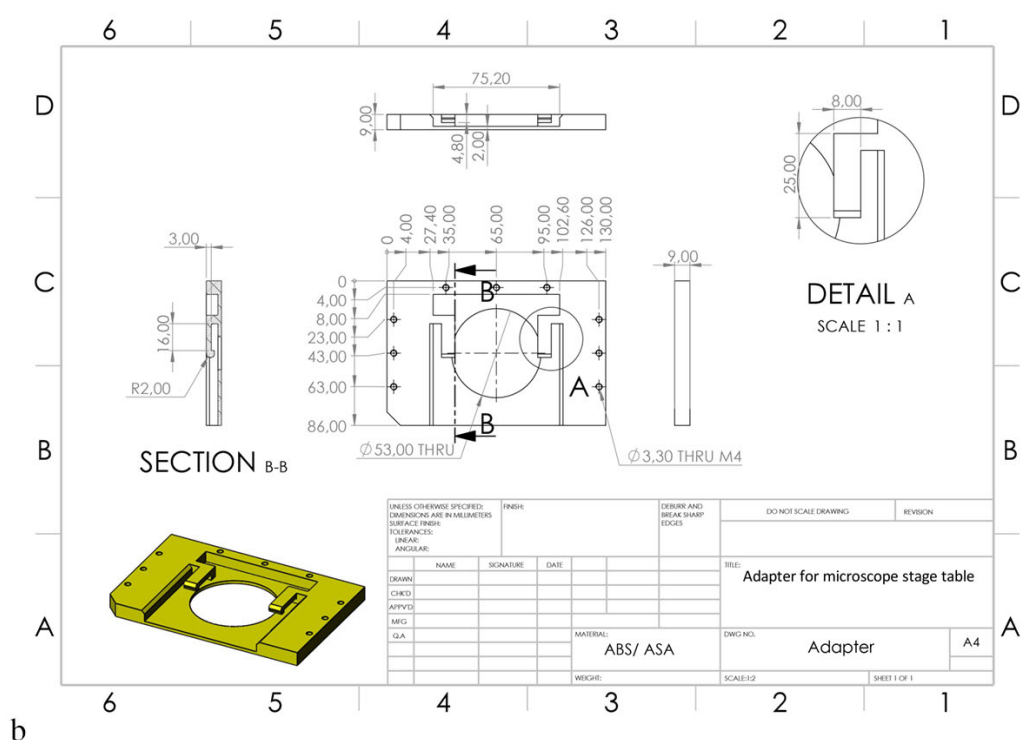

b

**Fig. S1.** Technical drawings of (a) the sample chamber holder and (b) the adapter for the microscope stage table. The two components were 3D printed in plastic.

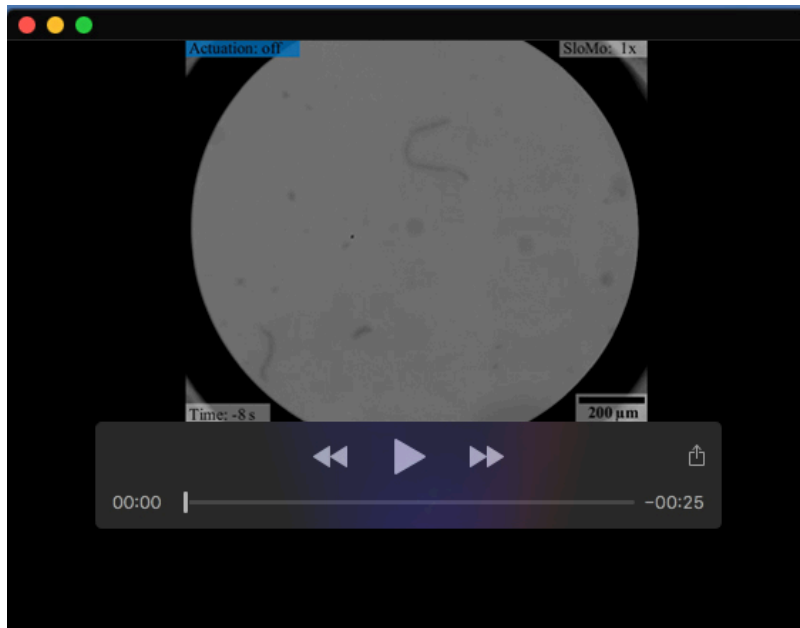

**Movie 1.** The swimming motion of the dinoflagellate *Alexandrium minutum* observed with 10 x magnification.

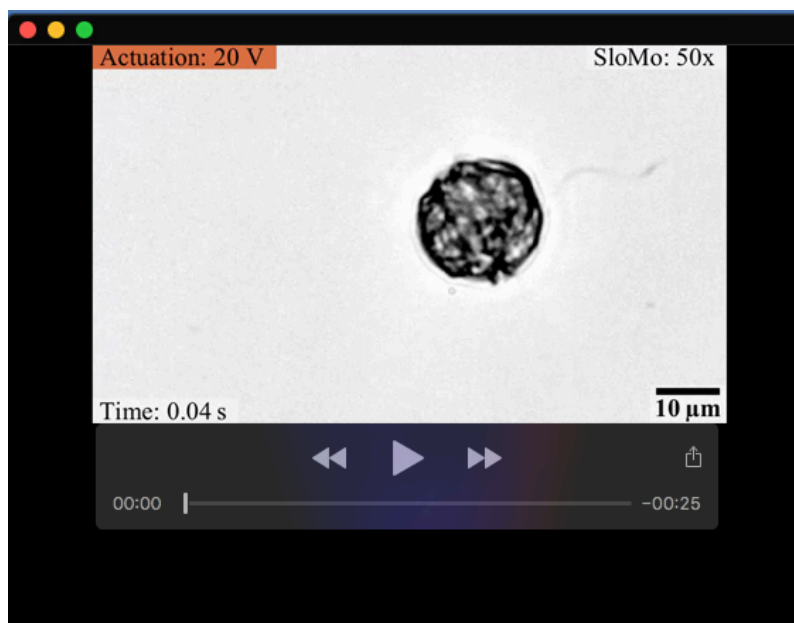

**Movie 2.** The flagellar beat of the dinoflagellate *Alexandrium minutum* observed with 40 x magnification.

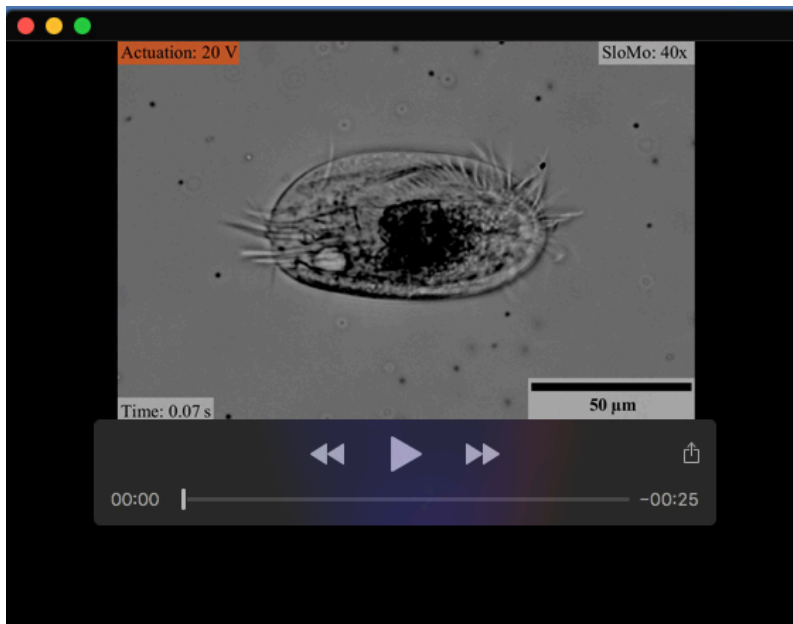

**Movie 3.** The periodic beat motion of the cilia in the membranellar band of the ciliate *Euplotes vannus* observed with 40 x magnification.
